# Supplementary material for: TNF signaling drives myeloid-derived suppressor cell accumulation
Source: JCI journal article supplement (doi:10.1172/jci64115), 2012-10-15
Supplement: sd1 [file 1]

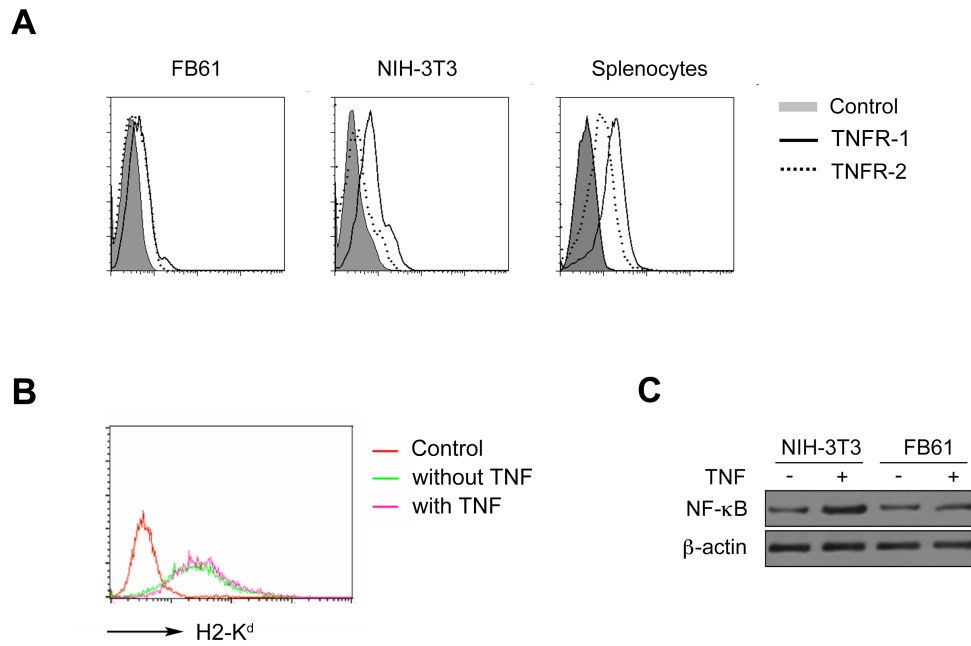

**Figure S1**

TNFR deficient tumor cells do not respond to TNF. **(A)** The TNFR-1 deficient FB61 cells, TNFR-1 competent NIH-3T3 cells and TNFR-competent splenocytes were stained for TNFR-1 (solid lines) and TNFR-2 (dotted lines). The corresponding cells without staining (shaded) served as negative controls. **(B)** FB61 cells were left untreated or stimulated with TNF (20 ng/ml) for 12 hours. H2-K<sup>d</sup> was then stained for flow cytometry. Cells without staining were used as control. **(C)** FB61 cells and NIH-3T3 cells were stimulated with TNF (20 ng/ml) for 20 minutes. The NF- $\kappa$ B levels in nuclear extracts were determined by Western blot. The  $\beta$ -actin was used as internal control.

**A**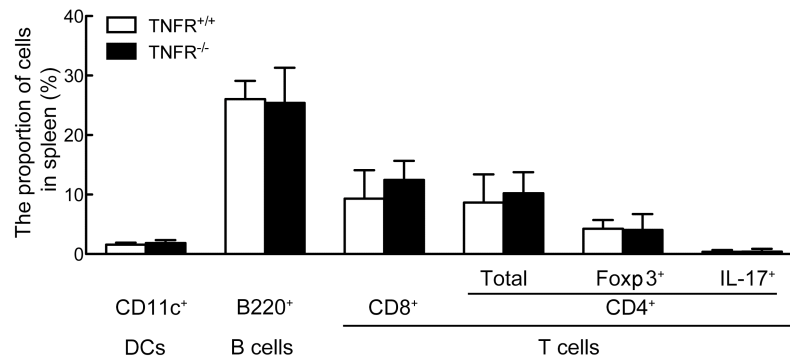**B**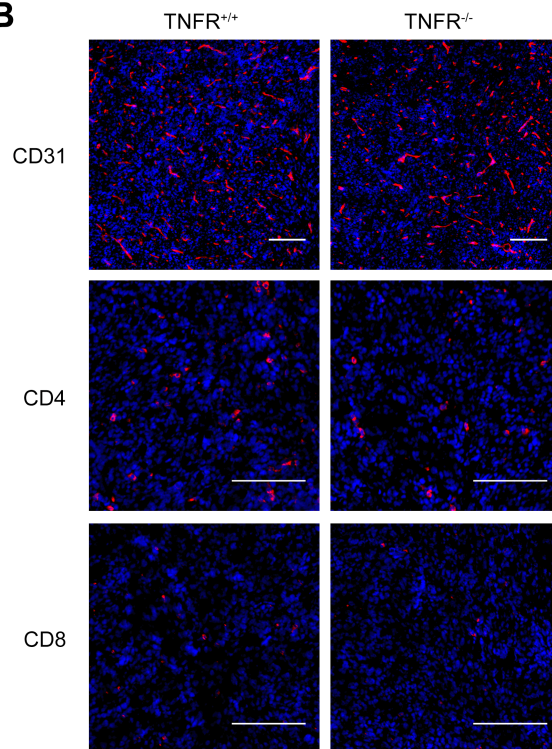**Figure S2**

Comparison of possible immune regulatory cells in tumor-bearing TNFR<sup>-/-</sup> and TNFR<sup>+/+</sup> mice. **(A)** TNFR<sup>+/+</sup> and TNFR<sup>-/-</sup> mice were subcutaneously injected with  $1 \times 10^6$  FB61 cells. At day 8-10, spleen cells were prepared and stained for CD11c, B220, CD4, CD8, Foxp3 and IL-17 for flow cytometry analysis. Shown are percentages of indicated cells in the spleen of TNFR<sup>+/+</sup> and TNFR<sup>-/-</sup> mice (mean  $\pm$  SEM). Each group contains 5-7 mice. **(B)** Immunohistochemistry analysis for CD31<sup>+</sup> endothelial cells, CD4<sup>+</sup> and CD8<sup>+</sup> T cells in FB61 tumors isolated from TNFR<sup>+/+</sup> and TNFR<sup>-/-</sup> mice at day 8-10 after tumor cell inoculation. Nuclei were counterstained with DAPI. Images representative for at least 3 mice per group; original magnification is ×100 for CD31 staining and ×200 for CD4 or CD8 staining; bars indicate 300 μm.

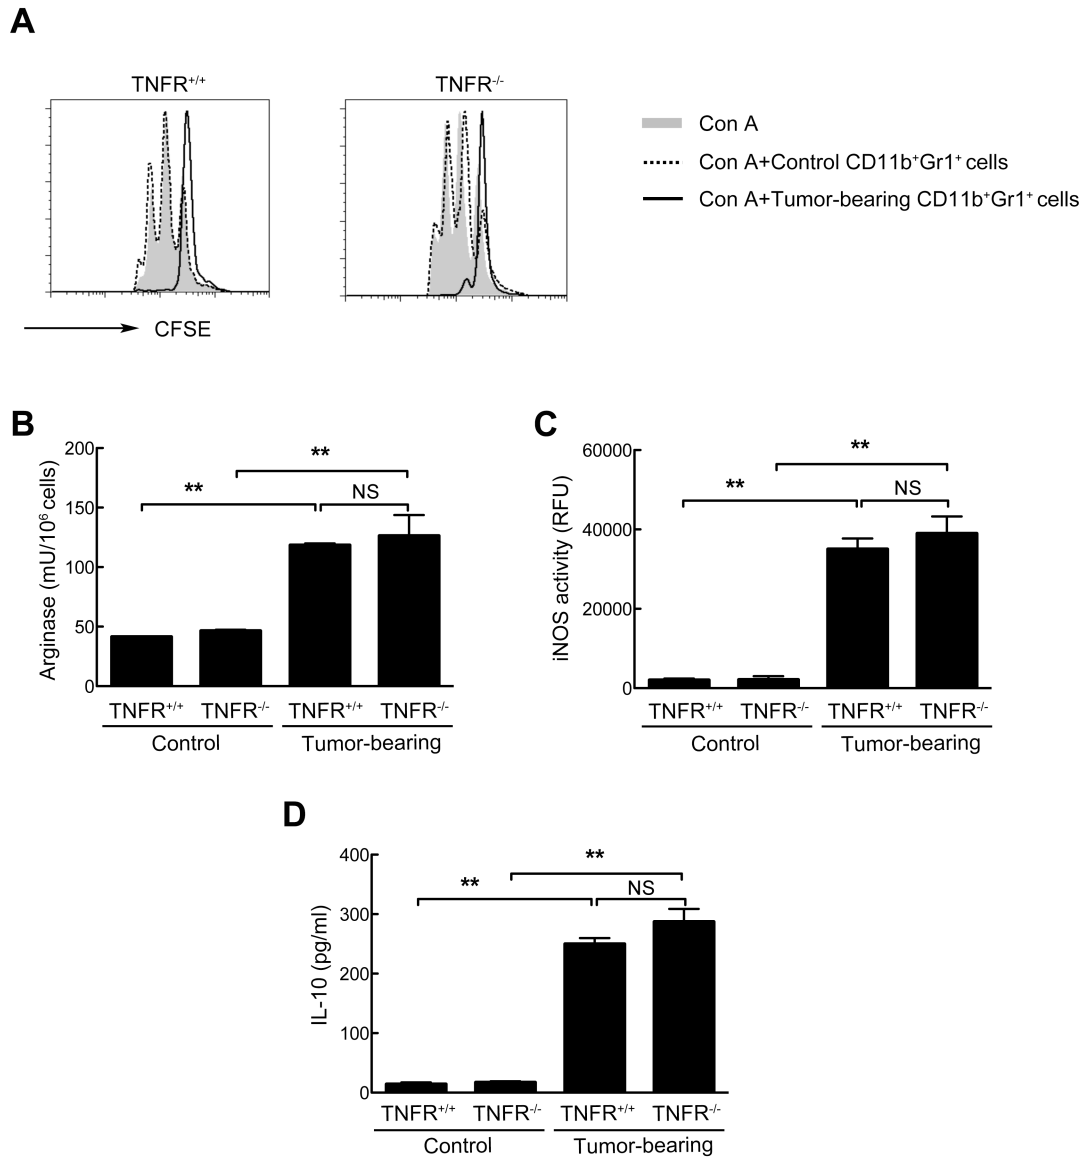

**Figure S3**

CD11b<sup>+</sup>Gr1<sup>+</sup> cells from tumor-bearing mice have T-cell suppressive activities. Splenic CD11b<sup>+</sup>Gr1<sup>+</sup> cells were isolated from tumor-free (as control) or FB61 tumor-bearing TNFR<sup>+/+</sup> and TNFR<sup>-/-</sup> mice. **(A)** The CFSE-labeled TNFR<sup>+/+</sup> splenocytes were stimulated with Con A in the absence (shaded) or presence of CD11b<sup>+</sup>Gr1<sup>+</sup> cells, which were isolated from either tumor-bearing (solid lines) or control mice (dotted lines) as indicated. After 72 hours, cells were collected and stained for CD4. The T-cell proliferation was determined by CFSE dilutions in gated CD4<sup>+</sup> T cells. **(B)** The activity of arginase and **(C)** iNOS in isolated TNFR<sup>+/+</sup> and TNFR<sup>-/-</sup> CD11b<sup>+</sup>Gr1<sup>+</sup> cells were measured as described in the Methods. **(D)** CD11b<sup>+</sup>Gr1<sup>+</sup> cells were stimulated with LPS and IFN $\gamma$ . The IL-10 content in the culture supernatant was measured by a CBA kit. Data are shown as mean  $\pm$  SEM. NS, not significant. \*\* $P < 0.01$ .

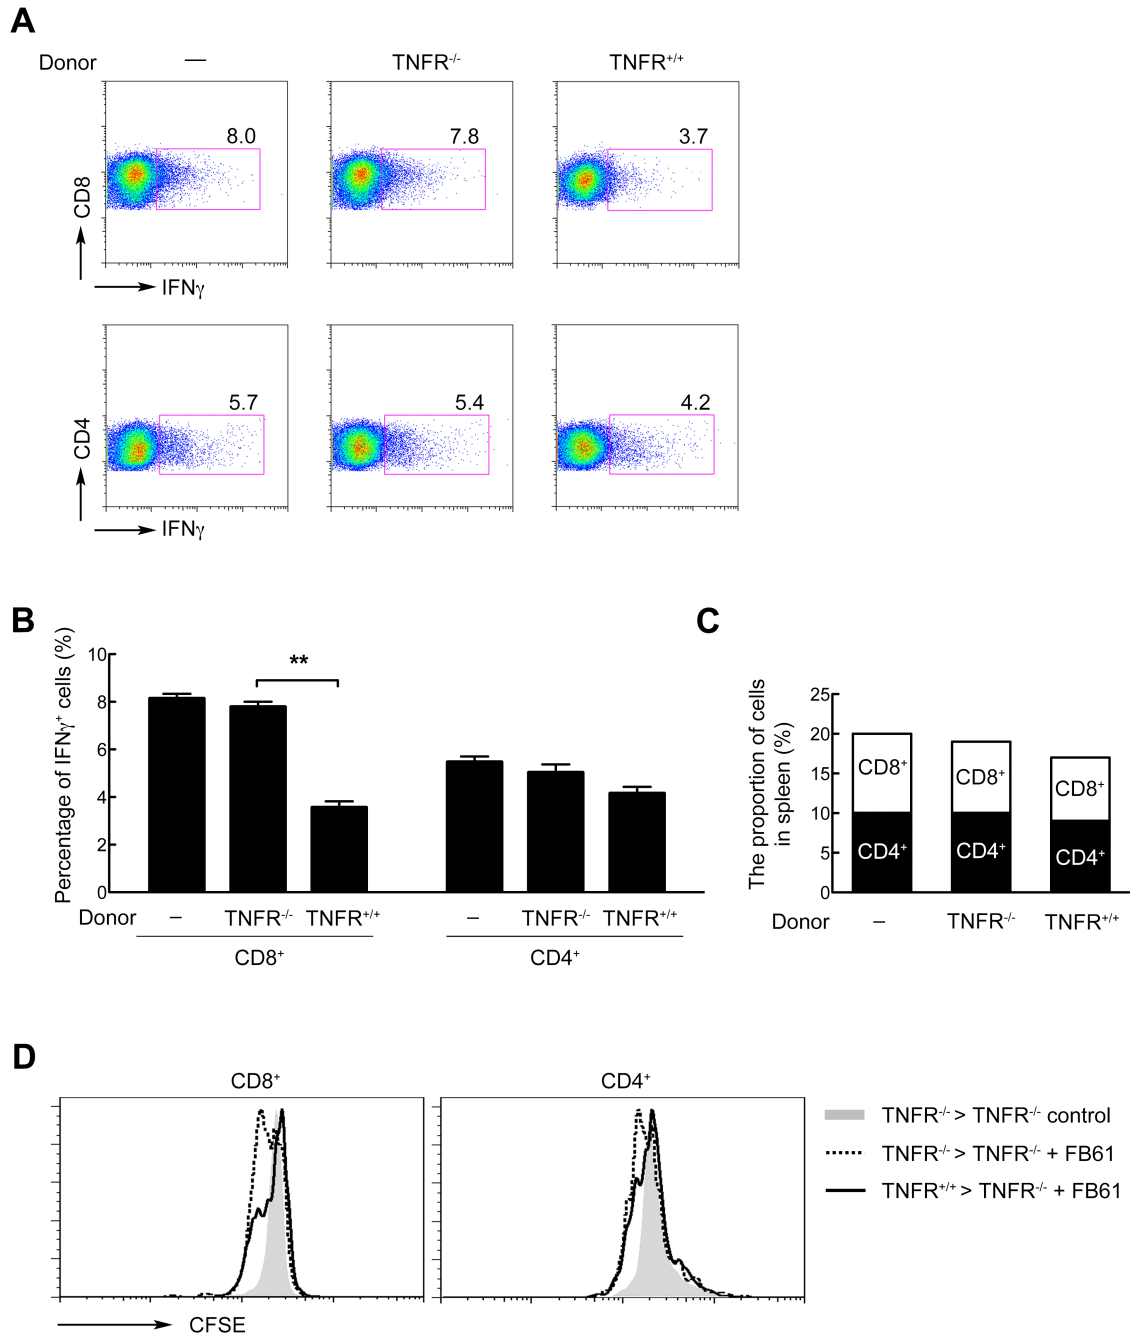

**Figure S4**

Adoptive transfer of TNFR-competent MDSCs suppresses anti-tumor T cell responses in TNFR-deficient mice. **(A)** The TNFR<sup>-/-</sup> mice were left untreated (—) or transferred with TNFR<sup>-/-</sup> or TNFR<sup>+/+</sup> MDSCs, and then injected with FB61 cells as described in **Figure 3**. At day 7 after tumor cell inoculation, spleen cells were isolated, stimulated with PMA/ionomycin and stained for intracellular IFN $\gamma$ . Numbers in the representative dot plots indicate the IFN $\gamma$ <sup>+</sup> cell percentages in gated CD8<sup>+</sup> or CD4<sup>+</sup> cells. Each group contains 3-4 mice. **(B)** The percentages of IFN $\gamma$ <sup>+</sup> cells in **A** are presented as the mean  $\pm$  SEM. \*\* $P < 0.01$ . **(C)** The average proportion of total CD4<sup>+</sup> (closed) or CD8<sup>+</sup> (open) cells in splenocytes of the two groups of mice in **A**. **(D)** Tumor-specific proliferation of CD8<sup>+</sup> T cells is inhibited in TNFR<sup>-/-</sup> mice that received TNFR<sup>+/+</sup> MDSCs. The splenocytes isolated from TNFR<sup>-/-</sup> > TNFR<sup>-/-</sup> (dashed) or TNFR<sup>+/+</sup> > TNFR<sup>-/-</sup> mice (solid lines) at day 7 were labeled with CFSE, and cultured in the presence of FB61 cell lysate. As control, TNFR<sup>-/-</sup> > TNFR<sup>-/-</sup> splenocytes were cultured in the absence of FB61 cell lysate (shaded). After 72 hours, cells were collected and stained. The T-cell proliferation was determined by CFSE dilutions of gated CD8<sup>+</sup> or CD4<sup>+</sup> T cells.

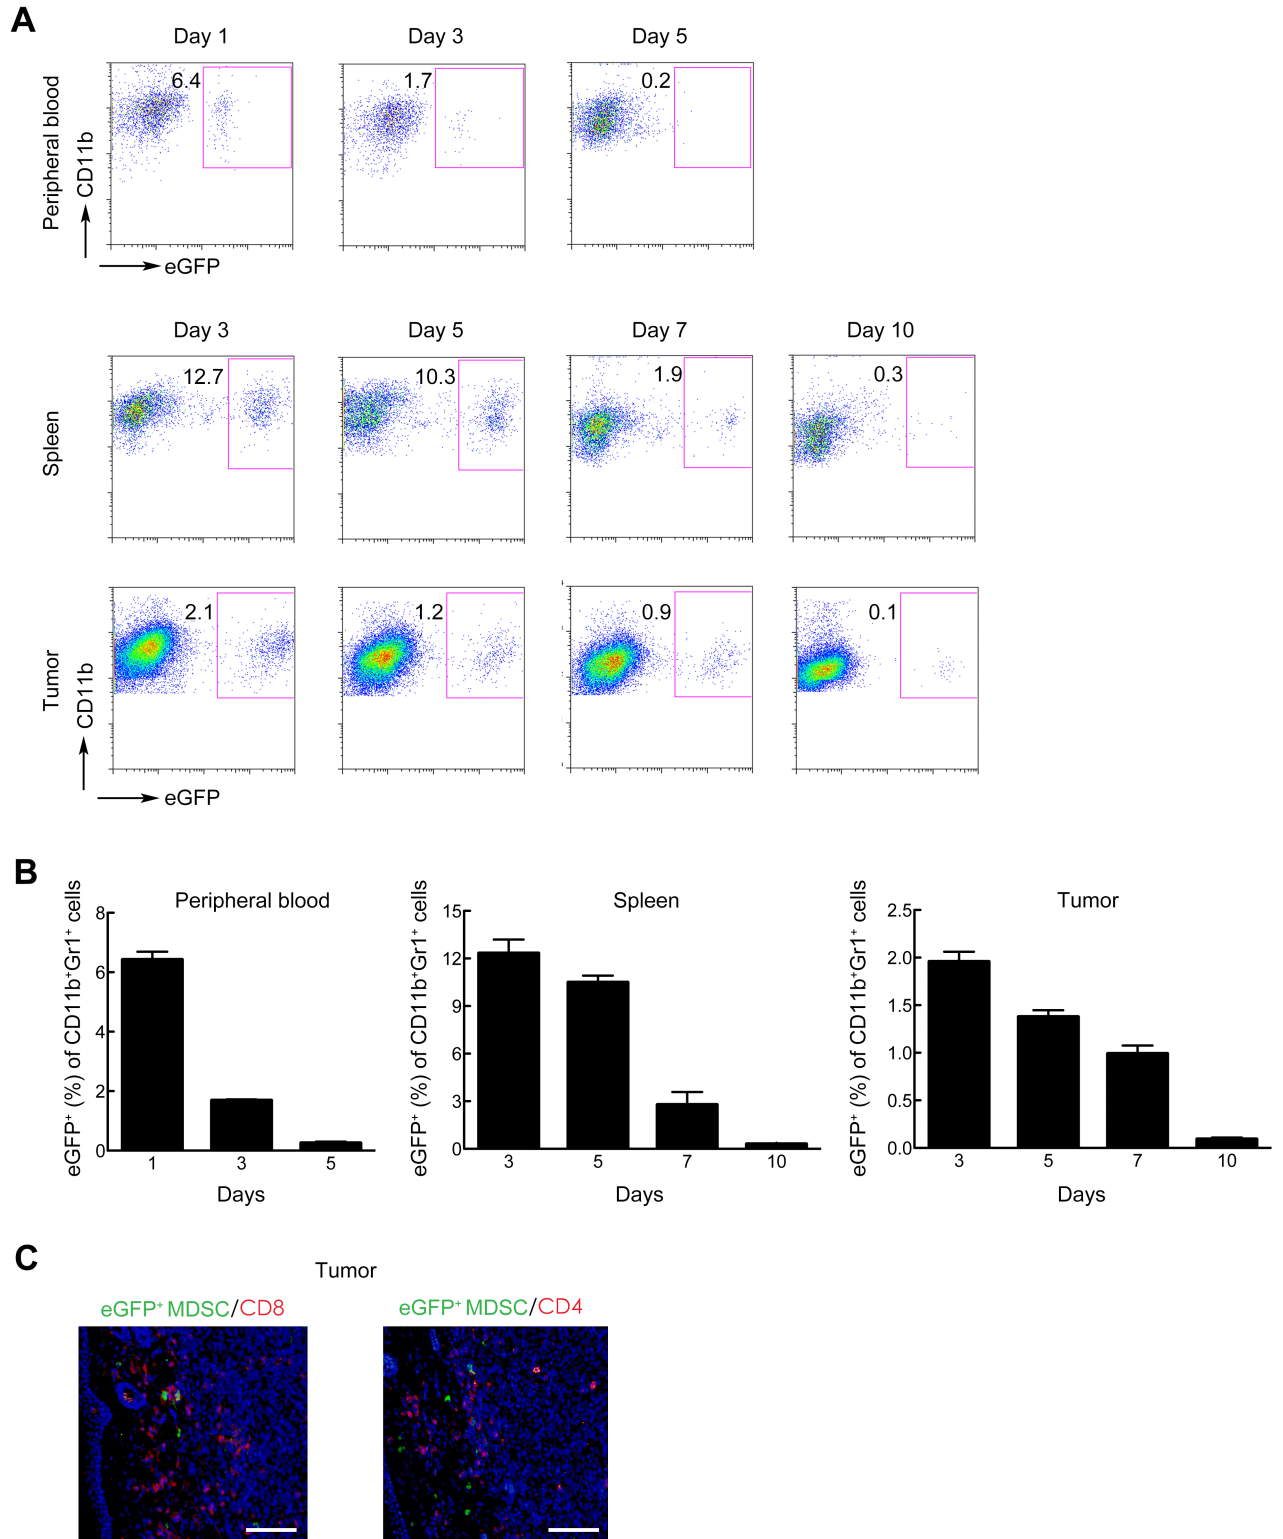

**Figure S5**

Adoptively transferred MDSCs accumulate in spleens and tumors of the recipient mice. **(A)** The CD11b<sup>+</sup>Gr1<sup>+</sup> cells were isolated from MCA205 tumor-bearing eGFP-transgenic mice as described in the Methods. Syngeneic C57BL/6 mice were intravenously injected with  $5 \times 10^6$  of the isolated cells, and 12 hours later subcutaneously inoculated with  $1 \times 10^6$  MCA205 tumor cells. At different days after tumor cell inoculation, total cells from the peripheral blood, spleen and tumor tissues were stained and analyzed by flow cytometry. CD11b<sup>+</sup>Gr1<sup>+</sup> cells were gated and the numbers indicate the percentages of eGFP positive cells in total gated cells at each indicated time point. **(B)** Percentages of eGFP<sup>+</sup> cells in total CD11b<sup>+</sup>Gr1<sup>+</sup> cells in peripheral blood, spleen or tumor tissues of the recipient mice are presented as the mean  $\pm$  SEM. Each group contains 3-5 mice. **(C)** The transferred MDSCs are detected in the vicinity of T cells in the outer rim of tumors. The syngeneic TNFR<sup>-/-</sup> mice were transferred with eGFP<sup>+</sup> MDSCs and inoculated with MCA205 tumor cells as described in **A**. At the day 7 after tumor cell inoculation, the eGFP<sup>+</sup> MDSCs (green) and CD4<sup>+</sup> or CD8<sup>+</sup> cells (red) in tumors were visualized by immunofluorescence staining. Nuclei were counterstained with DAPI (blue). Images are representative for at least 3 mice per group; original magnification is  $\times 100$ ; bars indicate 100  $\mu$ m.

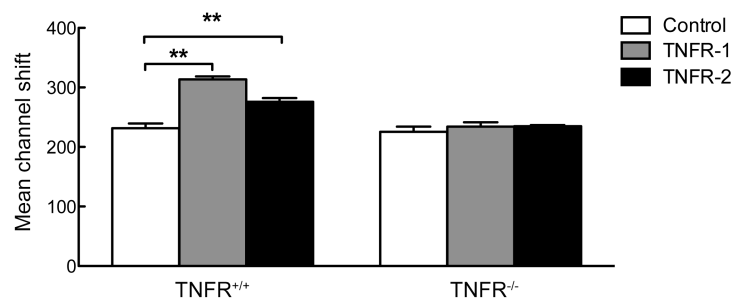

**Figure S6**

The expression of TNFR-1 and TNFR-2 on MDSCs. TNFR<sup>+/+</sup> and TNFR<sup>-/-</sup> mice were subcutaneously injected with  $1 \times 10^6$  FB61 cells. At day 8-10, spleen cells were prepared and stained with anti-CD11b, anti-Gr1, anti-TNFR-1 or anti-TNFR-2 or isotype control mAbs (white) for flow cytometry analysis. Shown is the expression of TNFR-1 (grey) or TNFR-2 (black) as mean channel shift on gated CD11b<sup>+</sup>Gr1<sup>+</sup> cells (mean  $\pm$  SEM). \*\* $P < 0.01$ .

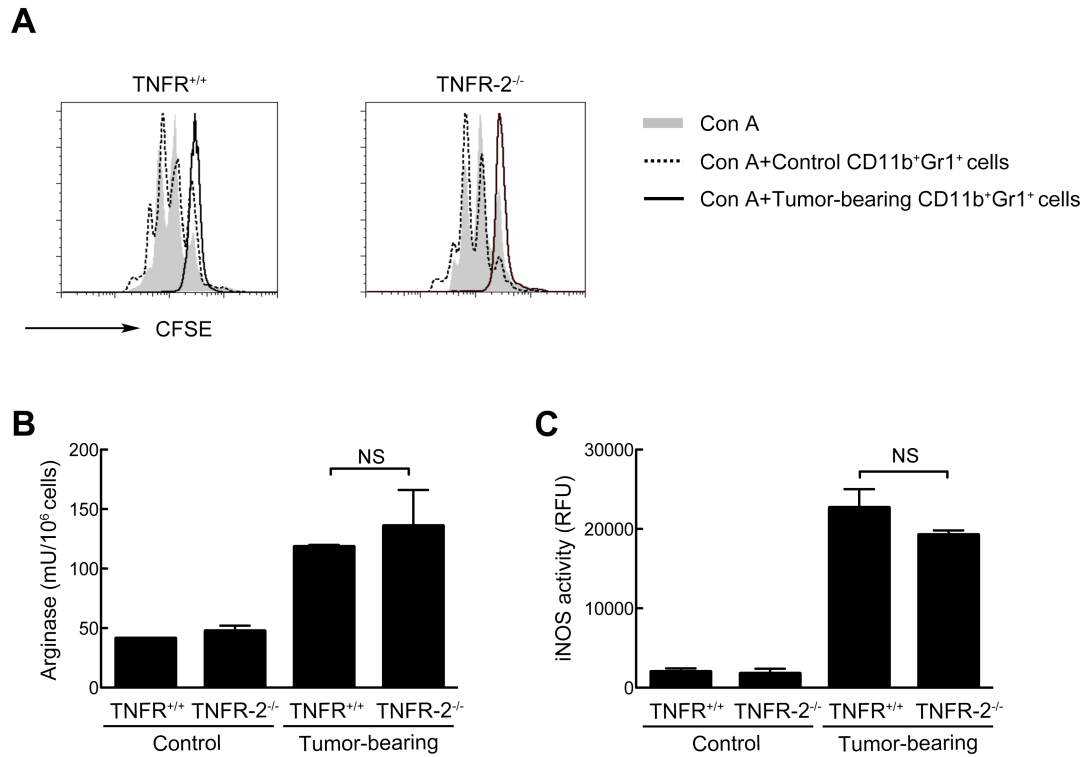

**Figure S7**

TNFR-2 deficiency does not affect the function of MDSCs. Splenic CD11b<sup>+</sup>Gr1<sup>+</sup> cells were isolated from tumor-free (as control) or FB61 tumor-bearing TNFR<sup>+/+</sup> and TNFR-2<sup>-/-</sup> mice. **(A)** The CFSE-labeled TNFR<sup>+/+</sup> splenocytes were stimulated with Con A in the absence (shaded) or presence of CD11b<sup>+</sup>Gr1<sup>+</sup> cells, which were isolated from either tumor-bearing (solid lines) or control mice (dotted lines) as indicated. After 72 hours, cells were collected and stained for CD4. The T-cell proliferation was determined by CFSE dilutions in gated CD4<sup>+</sup> T cells. **(B)** The activity of arginase and **(C)** iNOS in isolated TNFR<sup>+/+</sup> and TNFR-2<sup>-/-</sup> CD11b<sup>+</sup>Gr1<sup>+</sup> cells were measured as described in the Methods. Data are shown as mean  $\pm$  SEM. NS, not significant.

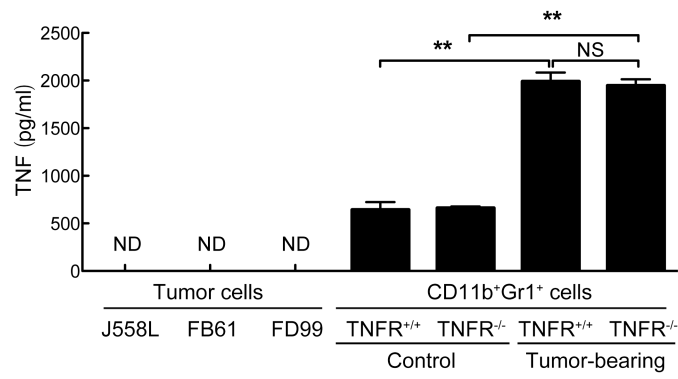

**Figure S8**

The host CD11b<sup>+</sup>Gr1<sup>+</sup> cells, but not tumor cells secrete TNF. The tumor J558L, FB61 and FD99 cells were cultured at  $2 \times 10^4$  cells in 200  $\mu$ l medium for 48 hours. CD11b<sup>+</sup>Gr1<sup>+</sup> cells from mice as indicated were cultured at  $2 \times 10^5$  cells in 200  $\mu$ l medium, stimulated with LPS and IFN $\gamma$  for 16 hours. The TNF concentrations in the culture supernatant were determined by a CBA kit. ND, not detectable. NS, not significant. \*\* $P < 0.01$ .
